# Supplementary material for: Exploring Diet and Nutrient Insufficiencies across Age Groups: Insights from a Population-Based Study of Brazilian Adults
Source: MDPI journal article supplement (doi:10.3390/nu16050750), 2024-03-05
Supplement: s1 [file s1]

**Table S1:** Macronutrient intake in adults in the urban areas of Brazil, 2015.

|                                                    | <b>Carbohydrates</b> | <b>Proteins</b> | <b>Total fats</b> |
|----------------------------------------------------|----------------------|-----------------|-------------------|
| <b>AMDR</b>                                        | <b>45-65%</b>        | <b>10-35%</b>   | <b>20-35%</b>     |
|                                                    | <b>n (%)</b>         | <b>n (%)</b>    | <b>n (%)</b>      |
| <b>Total population (n = 1812)</b>                 |                      |                 |                   |
| Below AMDR                                         | 247 (13.6%)          | 6 (0.3%)        | 30 (1.7%)         |
| Within AMDR                                        | 1535 (84.7%)         | 1806 (99.7%)    | 1463 (80.7%)      |
| Above AMDR                                         | 30 (1.7%)            | 0 (0.00%)       | 319 (17.6%)       |
| <b>Male (n = 828)</b>                              |                      |                 |                   |
| Below AMDR                                         | 121 (14.6%)          | 3 (0.4%)        | 19 (2.3%)         |
| Within AMDR                                        | 697 (84.2%)          | 825 (99.6%)     | 675 (81.5%)       |
| Above AMDR                                         | 10 (1.2%)            | 0 (0.00%)       | 134 (16.2%)       |
| <b>Female (n = 984)</b>                            |                      |                 |                   |
| Below AMDR                                         | 126 (12.8%)          | 3 (0.3%)        | 11 (1.1%)         |
| Within AMDR                                        | 838 (85.2%)          | 981 (99.7%)     | 788 (80.1%)       |
| Above AMDR                                         | 20 (2.0%)            | 0 (0.00%)       | 185 (18.8%)       |
| Acceptable macronutrient distribution range (AMDR) |                      |                 |                   |
