# Supplementary material for: Exploring Diet and Nutrient Insufficiencies across Age Groups: Insights from a Population-Based Study of Brazilian Adults
Source: MDPI journal article supplement (doi:10.3390/nu16050750), 2024-03-05
Supplement: s1 [file s1]

**Table S2:** Top 10 food sources contributing to nutrient total intake in adults in the urban areas of Brazil, 2015.

|        |                                                                              | PROTEIN                          |                         |       |       |
|--------|------------------------------------------------------------------------------|----------------------------------|-------------------------|-------|-------|
| FoodID | Food name (category)                                                         | Contribution to total intake (%) | Frequency of intake (n) | Mean  | SD    |
| 6510   | beef, steak - beef, sirloin, visible fat eaten                               | 11.92                            | 479                     | 132.1 | 85.1  |
| 6256   | poultry, chicken, breast, skin removed before cooking                        | 7.38                             | 346                     | 97.9  | 78.5  |
| 8741   | bread, loaf, French bread                                                    | 7.34                             | 1331                    | 66.6  | 32.6  |
| 6356   | beef, cubes or stew meat, tip or kabobs, visible fat eaten                   | 6.15                             | 299                     | 95.1  | 70.9  |
| 11009  | vegetables, beans, brown, canned - drained, regular                          | 5.45                             | 1426                    | 55.7  | 41.2  |
| 9097   | fish and seafood, cod, cooked from fresh or frozen, Atlantic                 | 5.06                             | 152                     | 206.7 | 138.4 |
| 4338   | milk, whole (3.5 - 4% fat)                                                   | 3.63                             | 1142                    | 143.0 | 117.4 |
| 18389  | beef, hamburger or ground beef, 10% fat (90% lean meat)                      | 3.61                             | 292                     | 66.0  | 67.0  |
| 8558   | grains, rice, white, regular cooking, cooked in salted water                 | 3.55                             | 1820                    | 102.9 | 67.3  |
| 6271   | poultry, chicken, thigh, skin eaten                                          | 3.19                             | 231                     | 69.5  | 55.3  |
|        |                                                                              | OMEGA 3                          |                         |       |       |
| FoodID | Food name (category)                                                         | Contribution to total intake (%) | Frequency of intake (n) | Mean  | SD    |
| 9097   | fish and seafood, cod, cooked from fresh or frozen, Atlantic                 | 41.03                            | 152                     | 206.7 | 138.4 |
| 114107 | fish and seafood, salmon, cooked from fresh or frozen, coho (silver), farmed | 10.34                            | 7                       | 200.0 | 28.9  |
| 6271   | poultry, chicken, thigh, skin eaten                                          | 9.52                             | 231                     | 69.5  | 55.3  |
| 6256   | poultry, chicken, breast, skin removed before cooking                        | 8.64                             | 346                     | 97.9  | 78.5  |
| 1798   | ingredient, egg, whole                                                       | 7.10                             | 499                     | 44.0  | 43.0  |
| 9459   | fish and seafood, sardines, canned in oil, drained                           | 5.69                             | 19                      | 69.4  | 51.4  |
| 9462   | fish and seafood, sardines, cooked from fresh or frozen                      | 4.98                             | 7                       | 69.9  | 43.9  |
| 6255   | poultry, chicken, breast, skin eaten                                         | 1.36                             | 79                      | 101.4 | 77.9  |
| 9162   | fish and seafood, hake, cooked from fresh or frozen, silver                  | 0.89                             | 1                       | 120.0 | .     |
| 975    | eggs, boiled                                                                 | 0.82                             | 87                      | 29.6  | 27.6  |
|        |                                                                              | IRON                             |                         |       |       |
| FoodID | Food name (category)                                                         | Contribution to total intake (%) | Frequency of intake (n) | Mean  | SD    |
| 11009  | vegetables, beans, brown, canned - drained, regular                          | 20.02                            | 1426                    | 55.7  | 41.2  |
| 8741   | bread, loaf, French bread                                                    | 18.03                            | 1331                    | 66.6  | 32.6  |
| 6510   | beef, steak - beef, sirloin, visible fat eaten                               | 5.21                             | 479                     | 132.1 | 85.1  |
| 11014  | vegetables, beans, black, canned - drained, regular                          | 3.12                             | 218                     | 49.2  | 26.1  |
| 8531   | grains, pasta or noodles, spaghetti noodles, white, cooked in salted water   | 3.11                             | 343                     | 124.6 | 95.0  |
| 1821   | ingredient, flour, white all-purpose, enriched                               | 2.86                             | 616                     | 22.8  | 26.1  |
| 18389  | beef, hamburger or ground beef, 10% fat (90% lean meat)                      | 2.80                             | 292                     | 66.0  | 67.0  |
| 6356   | beef, cubes or stew meat, tip or kabobs, visible fat eaten                   | 2.34                             | 299                     | 95.1  | 70.9  |
| 27320  | crackers, wheat, reduced fat                                                 | 1.89                             | 257                     | 36.1  | 31.8  |
| 6395   | beef, organ meats, liver                                                     | 1.81                             | 35                      | 184.3 | 92.7  |
|        |                                                                              | VITAMIN D                        |                         |       |       |
| FoodID | Food name (category)                                                         | Contribution to total intake (%) | Frequency of intake (n) | Mean  | SD    |
| 4338   | milk, whole (3.5 - 4% fat)                                                   | 33.96                            | 1142                    | 143.0 | 117.4 |
| 1798   | ingredient, egg, whole                                                       | 7.79                             | 499                     | 44.0  | 43.0  |
| 6510   | beef, steak - beef, sirloin, visible fat eaten                               | 7.22                             | 479                     | 132.1 | 85.1  |
| 9097   | fish and seafood, cod, cooked from fresh or frozen, Atlantic                 | 5.89                             | 152                     | 206.7 | 138.4 |
| 4350   | milk, unprepared dry powder, whole                                           | 5.40                             | 206                     | 15.3  | 13.6  |
| 114107 | fish and seafood, salmon, cooked from fresh or frozen, coho (silver), farmed | 3.69                             | 7                       | 200.0 | 28.9  |

|               |                                                                                                          |                                         |                                |             |           |
|---------------|----------------------------------------------------------------------------------------------------------|-----------------------------------------|--------------------------------|-------------|-----------|
| 25488         | milk, mixtures and milk drinks, cocoa or hot chocolate, dry mix - unprepared, regular, chocolate flavors | 3.09                                    | 159                            | 21.6        | 11.7      |
| 4783          | yogurt, plain, whole milk (3-4% fat)                                                                     | 2.75                                    | 39                             | 216.3       | 129.4     |
| 3203          | cheese, American cheese, process                                                                         | 2.19                                    | 44                             | 40.6        | 44.5      |
| 4787          | yogurt, fruited, regular, whole milk (3-4% fat)                                                          | 2.01                                    | 35                             | 175.9       | 73.1      |
|               |                                                                                                          | <b>TOTAL FIBER</b>                      |                                |             |           |
| <b>FoodID</b> | <b>Food name (category)</b>                                                                              | <b>Contribution to total intake (%)</b> | <b>Frequency of intake (n)</b> | <b>Mean</b> | <b>SD</b> |
| 11009         | vegetables, beans, brown, canned - drained, regular                                                      | 39.33                                   | 1426                           | 55.7        | 41.2      |
| 8558          | grains, rice, white, regular cooking, cooked in salted water                                             | 8.73                                    | 1820                           | 102.9       | 67.3      |
| 8741          | bread, loaf, French bread                                                                                | 6.19                                    | 1331                           | 66.6        | 32.6      |
| 11014         | vegetables, beans, black, canned - drained, regular                                                      | 5.25                                    | 218                            | 49.2        | 26.1      |
| 7581          | vegetables, potato, boiled, without skin                                                                 | 2.29                                    | 456                            | 117.5       | 137.9     |
| 8485          | grains, pasta or noodles, egg noodles, white, cooked in salted water                                     | 2.08                                    | 86                             | 148.0       | 96.9      |
| 3159          | vegetables, tomato, raw                                                                                  | 1.78                                    | 590                            | 86.5        | 169.1     |
| 4974          | fruit, banana, fresh or ripe                                                                             | 1.77                                    | 423                            | 71.8        | 50.6      |
| 11137         | fruit, guava (guayaba), fresh common                                                                     | 1.56                                    | 68                             | 140.5       | 119.1     |
| 5217          | fruit, orange, fresh                                                                                     | 1.30                                    | 148                            | 167.5       | 135.0     |
|               |                                                                                                          | <b>CALCIUM</b>                          |                                |             |           |
| <b>FoodID</b> | <b>Food name (category)</b>                                                                              | <b>Contribution to total intake (%)</b> | <b>Frequency of intake (n)</b> | <b>Mean</b> | <b>SD</b> |
| 4338          | milk, whole (3.5 - 4% fat)                                                                               | 24.57                                   | 1142                           | 143.0       | 117.4     |
| 3264          | cheese, Mozzarella cheese, whole milk                                                                    | 11.40                                   | 339                            | 31.4        | 28.2      |
| 11009         | vegetables, beans, brown, canned - drained, regular                                                      | 5.25                                    | 1426                           | 55.7        | 41.2      |
| 4350          | milk, unprepared dry powder, whole                                                                       | 3.43                                    | 206                            | 15.3        | 13.6      |
| 4864          | cheese, American cheese, process - reduced fat                                                           | 2.83                                    | 76                             | 52.5        | 38.7      |
| 3265          | cheese, Mozzarella cheese, part skim milk, regular                                                       | 2.44                                    | 80                             | 26.5        | 27.9      |
| 10784         | ingredient, cornmeal - dry, yellow (degermed, enriched)                                                  | 1.86                                    | 123                            | 56.5        | 56.5      |
| 8741          | bread, loaf, French bread                                                                                | 1.73                                    | 1331                           | 66.6        | 32.6      |
| 4341          | milk, skim, nonfat or fat free                                                                           | 1.70                                    | 65                             | 175.4       | 169.8     |
| 149           | beverages, beer, regular                                                                                 | 1.67                                    | 206                            | 1655.7      | 1599.0    |
|               |                                                                                                          | <b>VITAMIN A</b>                        |                                |             |           |
| <b>FoodID</b> | <b>Food name (category)</b>                                                                              | <b>Contribution to total intake (%)</b> | <b>Frequency of intake (n)</b> | <b>Mean</b> | <b>SD</b> |
| 6395          | beef, organ meats, liver                                                                                 | 56.89                                   | 35                             | 184.3       | 92.7      |
| 10719         | fats, margarine, regular, tub, salted, soybean oil                                                       | 6.54                                    | 1007                           | 14.7        | 17.6      |
| 4338          | milk, whole (3.5 - 4% fat)                                                                               | 4.51                                    | 1142                           | 143.0       | 117.4     |
| 7647          | vegetables, sweet potato, boiled                                                                         | 3.06                                    | 22                             | 291.6       | 237.2     |
| 1058          | fats, butter, regular, salted                                                                            | 2.93                                    | 333                            | 15.5        | 14.8      |
| 25488         | milk, mixtures and milk drinks, cocoa or hot chocolate, dry mix - unprepared, regular, chocolate flavors | 1.66                                    | 159                            | 21.6        | 11.7      |
| 2964          | vegetables, carrots, cooked from fresh                                                                   | 1.63                                    | 212                            | 39.6        | 36.7      |
| 4864          | cheese, American cheese, process - reduced fat                                                           | 1.52                                    | 76                             | 52.5        | 38.7      |
| 1798          | ingredient, egg, whole                                                                                   | 1.52                                    | 499                            | 44.0        | 43.0      |
| 13930         | vegetables, lettuce, green leaf                                                                          | 1.51                                    | 476                            | 34.9        | 25.8      |
|               |                                                                                                          | <b>VITAMIN C</b>                        |                                |             |           |
| <b>FoodID</b> | <b>Food name (category)</b>                                                                              | <b>Contribution to total intake (%)</b> | <b>Frequency of intake (n)</b> | <b>Mean</b> | <b>SD</b> |
| 8064          | beverages, juice or flavored drink, orange, juice, fresh                                                 | 18.97                                   | 150                            | 284.0       | 143.0     |
| 107891        | beverages, juice or flavored drink, acerola juice                                                        | 9.42                                    | 46                             | 106.3       | 63.3      |
| 5217          | fruit, orange, fresh                                                                                     | 8.01                                    | 148                            | 167.5       | 135.0     |
| 3159          | vegetables, tomato, raw                                                                                  | 6.57                                    | 590                            | 86.5        | 169.1     |
| 21192         | beverages, juice or flavored drink, dry mix - unprepared, fruit flavored drink, presweetened, with sugar | 5.95                                    | 451                            | 16.0        | 32.6      |

|                  |                                                                                            |                                         |                                |             |           |
|------------------|--------------------------------------------------------------------------------------------|-----------------------------------------|--------------------------------|-------------|-----------|
| 7942             | beverages, juice or flavored drink, black currant juice                                    | 5.64                                    | 15                             | 331.1       | 82.1      |
| 5221             | fruit, papaya, fresh                                                                       | 5.36                                    | 82                             | 130.8       | 98.4      |
| 11137            | fruit, guava (guayaba), fresh common                                                       | 4.68                                    | 68                             | 140.5       | 119.1     |
| 8066             | beverages, juice or flavored drink, orange, juice, purchased ready-to-drink, not fortified | 3.02                                    | 207                            | 71.6        | 145.2     |
| 5182             | fruit, mango, fresh                                                                        | 3.02                                    | 135                            | 121.7       | 93.5      |
| <b>VITAMIN E</b> |                                                                                            |                                         |                                |             |           |
| <b>FoodID</b>    | <b>Food name (category)</b>                                                                | <b>Contribution to total intake (%)</b> | <b>Frequency of intake (n)</b> | <b>Mean</b> | <b>SD</b> |
| 1177             | fats, oil, soybean - unhydrogenated                                                        | 18.15                                   | 6215                           | 3.1         | 4.1       |
| 10719            | fats, margarine, regular, tub, salted, soybean oil                                         | 11.26                                   | 1007                           | 14.7        | 17.6      |
| 11009            | vegetables, beans, brown, canned - drained, regular                                        | 9.53                                    | 1426                           | 55.7        | 41.2      |
| 11709            | fruit, passion fruit (maracuya) - fresh                                                    | 4.47                                    | 77                             | 37.9        | 17.6      |
| 9097             | fish and seafood, cod, cooked from fresh or frozen, Atlantic                               | 3.84                                    | 152                            | 206.7       | 138.4     |
| 107857           | beverages, tea, Yerba Mate                                                                 | 3.66                                    | 37                             | 576.6       | 541.9     |
| 1169             | fats, oil, olive                                                                           | 3.39                                    | 541                            | 4.4         | 5.4       |
| 6510             | beef, steak - beef, sirloin, visible fat eaten                                             | 2.19                                    | 479                            | 132.1       | 85.1      |
| 3159             | vegetables, tomato, raw                                                                    | 2.18                                    | 590                            | 86.5        | 169.1     |
| 6381             | beef, jerky, regular                                                                       | 2.15                                    | 83                             | 78.1        | 75.5      |
| <b>MAGNESIUM</b> |                                                                                            |                                         |                                |             |           |
| <b>FoodID</b>    | <b>Food name (category)</b>                                                                | <b>Contribution to total intake (%)</b> | <b>Frequency of intake (n)</b> | <b>Mean</b> | <b>SD</b> |
| 11009            | vegetables, beans, brown, canned - drained, regular                                        | 17.61                                   | 1426                           | 55.7        | 41.2      |
| 7772             | beverages, coffee, regular (caffeinated), made from ground                                 | 6.80                                    | 1894                           | 136.1       | 84.6      |
| 149              | beverages, beer, regular                                                                   | 6.30                                    | 206                            | 1655.7      | 1599.0    |
| 8741             | bread, loaf, French bread                                                                  | 5.84                                    | 1331                           | 66.6        | 32.6      |
| 4338             | milk, whole (3.5 - 4% fat)                                                                 | 4.31                                    | 1142                           | 143.0       | 117.4     |
| 4974             | fruit, banana, fresh or ripe                                                               | 3.05                                    | 423                            | 71.8        | 50.6      |
| 8558             | grains, rice, white, regular cooking, cooked in salted water                               | 2.97                                    | 1820                           | 102.9       | 67.3      |
| 6510             | beef, steak - beef, sirloin, visible fat eaten                                             | 2.34                                    | 479                            | 132.1       | 85.1      |
| 11014            | vegetables, beans, black, canned - drained, regular                                        | 2.26                                    | 218                            | 49.2        | 26.1      |
| 8531             | grains, pasta or noodles, spaghetti noodles, white, cooked in salted water                 | 2.03                                    | 343                            | 124.6       | 95.0      |
